# Supplementary material
Source: PubMed Central journal article supplement (PMC6152375)
Supplement: mic-164-992-s001.pdf [file mic-164-992-s001.pdf]

## Supplementary Information

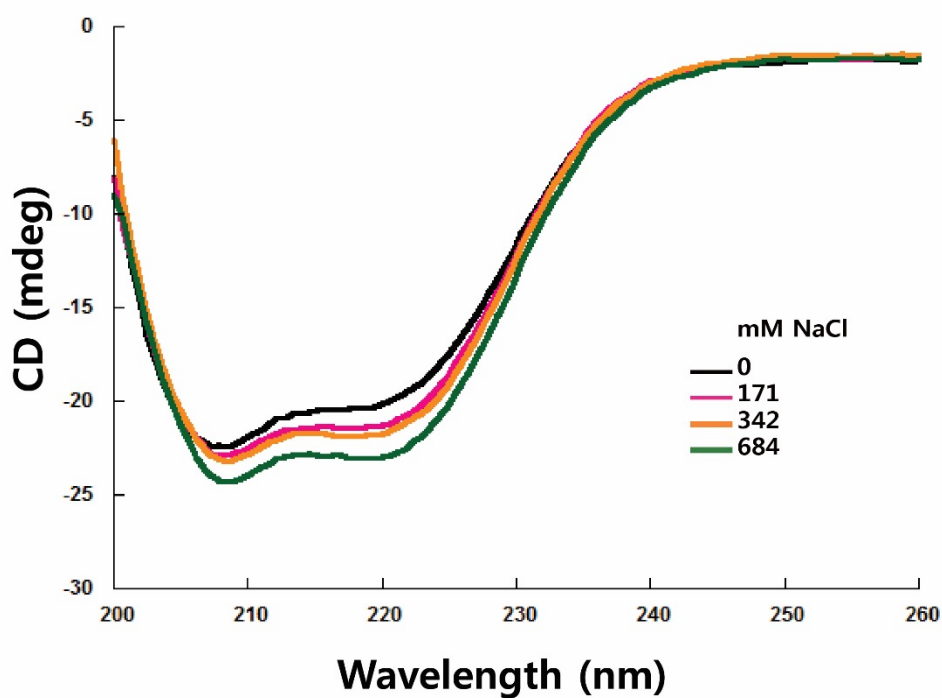

**FIG S1** The secondary structure of Im7 L53A I54A was monitored by circular dichroism spectroscopy at 10°C. 20  $\mu$ M of proteins in 20 mM sodium phosphate buffer at pH 7.2 containing NaCl concentrations ranging from 0 to 684 mM were used.
